# Supplementary material for: Chromatin remodelling and antisense-mediated up-regulation of the developmental switch gene eud-1 control predatory feeding plasticity
Source: PubMed Central journal article supplement (PMC4976200; doi:10.1038/ncomms12337), 2016-08-04
Supplement: ncomms12337-s1.pdf [file ncomms12337-s1.pdf]

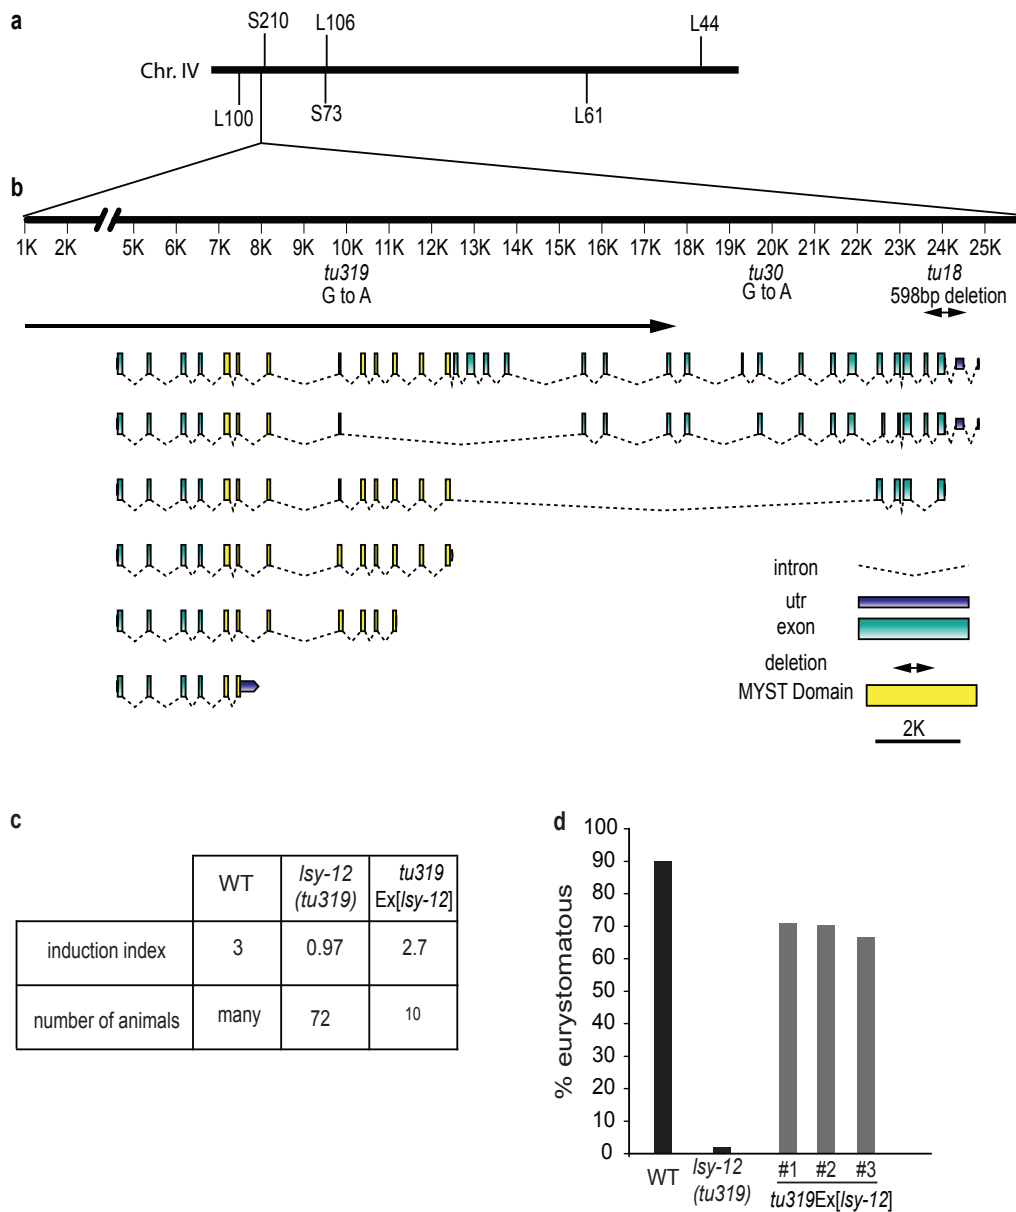

**Supplementary Figure 1: Mapping, gene structure and rescue of *P. pacificus Isy-12*.** (a) Genetic map showing the tip region of chromosome IV. (b) Exon – intron structure of *Ppa-Isy-12* deduced from cDNA cloning and sequencing and molecular nature of mutations. The various shown isoforms

are ordered by length. Note, that this list represents just a subset of the observed isoforms. Like in *C. elegans*, multiple isoforms exist and more than 30 exons are predicted for the *Ppa-Isy-12* gene. The successful rescue experiment indicated below were carried with a genomic fragment of approximately 17 kb covering 20 predicted exons as indicated by the arrow above the isoforms. (c) Rescue experiment of the vulva defect of *tu319*. In wild type hermaphrodites, three vulval precursor cells are induced to form vulval tissue as indicated by an induction index of 3. *tu319* mutant animals have an average induction of 0.97 cells that is rescued to an average induction of 2.7 cells by an array carrying multiple copies of *Ppa-Isy-12*. Only one transgenic line was tested for the rescue of the vulval defect. (d) Rescue experiment of the mouth-form defect of *tu319*. *tu319* animals are 2% Eu, whereas wild type hermaphrodites are 90% Eu under the same cultural conditions. Three independent transgenic lines (#1-#3) carrying multiple copies of *Ppa-Isy-12*, show 60-70% Eu animals as indicated by the analysis of more than 100 animals. Data are represented as the total Eu frequency.

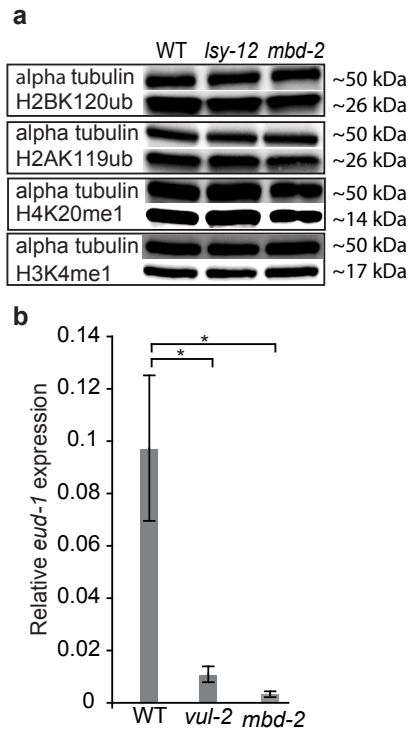

**Supplementary Figure 2: Histone modification of additional histone markers and *eud-1* expression in adult animals. (a)** *Ppa-Isy-12* and *Ppa-mbd-2* mutants do not result in obvious histone modification defects in several other tested histone marks. Here we show four representatives for ubiquitination (ub) and mono-methylation (me1). **(b)** qRT-PCR experiments reveal down regulation of *eud-1* expression in *Ppa-Isy-12* and *Ppa-mbd-2* mutants relative to wild type in adult worms. Error bars are s.e.m. \* $p < 0.05$  and \*\*\* $p < 10^{-5}$ , Kruskal-Wallis test.

ggaagactccgcaagaagcatgcaaactacattctaataatgatacaagagatttaacaatttactataataaatgtccagtt  
gaagaacaaaacacacggagaaggttgaagggttgcgaaagaactgatggaagcgagataaatcgtaggtatattta  
ttcttattcaagctgatcgtattcttgatcactccagttgagttcttctctcgagcatggctcttgaagcgcgcgctggaatc  
gatcactgcgtggagatgtagtagggtcgtaaaacaacgctaggtgggaccaggccgagtggttacaagggaatcat  
tattgggattttaatactagcaaattgtacctcggtttctctggtgaatgaagaactaaaatcatcaaccaaattctgagtc  
atatcgtcgaatatcatgggttgtgcaccaactcatcaccgtcatacaagaagcacttgggtccattgggaccatcaggaa  
cattgtctaaacaatcgcgaaattgggtgtgtagattttcagtaccttagtggtatcgcactcccatacatttgaaggaa  
gggtgactcccacgtattgaaaaccacgacgggaaggcaaatgtactccgtcagtagtgggttctgaagcataaccatttaa  
gtgctgataattacaattacttctcattgattccgagatgccattgccgatcattctgttcgtaacctgaatttgaatt  
attagatgtattcaattcaattcccacctcgttctcgaacatctcggccattgtagtctcatcttccgtagtctccaatgtct  
gaggaacgaacactcgag

**Supplementary Figure 3:** Nucleotide sequence of the *as-eud-1* transcript as obtained in RT-PCR experiments.

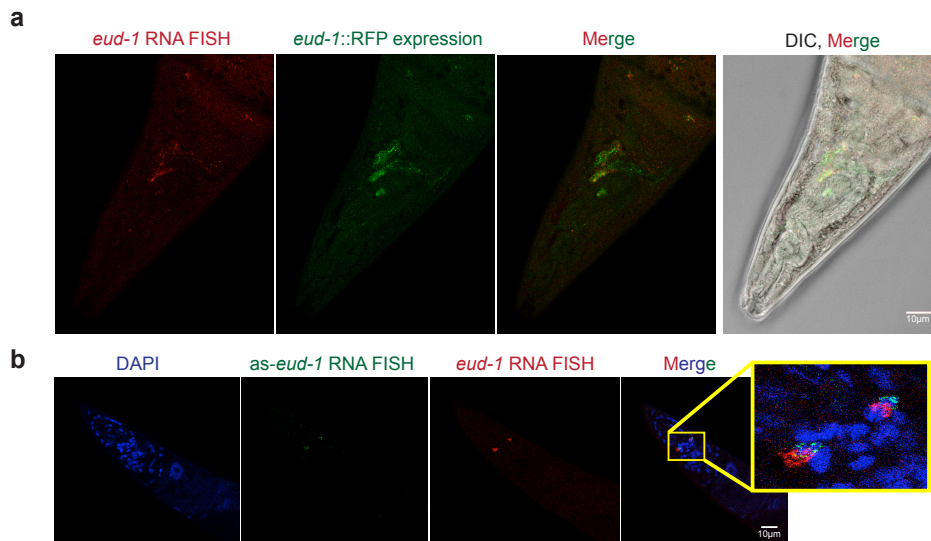

**Supplementary Figure 4: Fluorescent *in situ* hybridization (FISH) of *eud-1* and *as-eud-1*.** Photographs show adult animals and provide the same and additional photographs to those shown in Figure 4. (a) from left to right: i) *eud-1* FISH (red); ii) *eud-1::RFP* reporter construct (green); iii) merger of *eud-1* RNA FISH and *eud-1::RFP* expression showing overlap in yellow; iv) merger of both expressions with differential interference contrast (DIC) microscopy. (b) from left to right: i) DAPI staining; ii) *as-eud-1* RNA FISH (green); iii) *as-eud-1* (red); iv) co-expression of *eud-1* (red), *as-eud-1* (green) and DAPI.

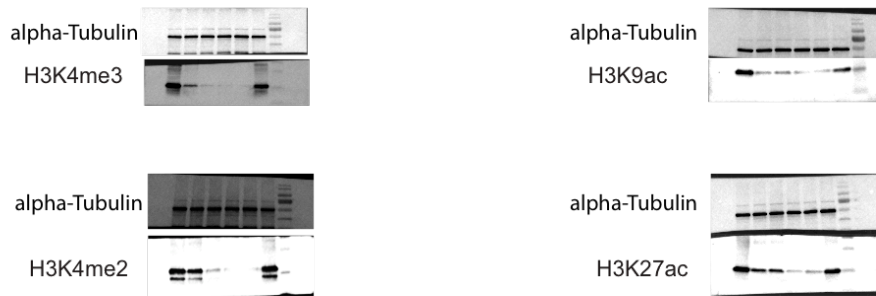

**Supplementary Figure 5: Histone modification of *Ppa-Isy-12* and *Ppa-mbd-2* mutants result in severe histone modification defects.** Un-cropped scans of blots provided in Figure 2b. Note that the original gels and blots contain additional lanes unrelated to this study. In each graph, the lanes relevant to this study are lanes 1-3 from the left, presenting wild type, *Isy-12* and *mbd-2* as shown in Figure 2b.

**Supplementary Table 1: Differentially expressed genes between wild type and *Ppa-lsy-12* mutant animals (blue, up-regulated; green, down regulated).**

| <b>P. pacificus Gene ID (version Hybrid1)</b> | <b>Expression foldchange</b> | <b>P (FDR corrected)</b> |
|-----------------------------------------------|------------------------------|--------------------------|
| Contig41-snap.23                              | 13,29000737                  | 1,84319E-07              |
| Contig22-snap.173                             | 9,101661929                  | 9,63592E-05              |
| Contig11-snap.172                             | 6,027375725                  | 0,000110313              |
| Contig70-snap.1                               | 12,39485939                  | 0,000128043              |
| Contig12-snap.157                             | 3,697320223                  | 0,000149273              |
| Contig106-snap.25                             | 4,775295463                  | 0,000300751              |
| Contig10-snap.353                             | 11,18109827                  | 0,000317931              |
| Contig41-snap.82                              | 7,096117999                  | 0,000919555              |
| Contig77-snap.8                               | 65,96916778                  | 0,00100054               |
| Contig143-snap.16                             | 16,83556227                  | 0,00105018               |
| Contig4-snap.53                               | 37,7475211                   | 0,00123591               |
| Contig22-snap.106                             | 3,599433838                  | 0,00179514               |
| Contig52-snap.11                              | 4,42065455                   | 0,00284796               |
| Contig29-snap.5                               | 61,43291773                  | 0,00333557               |
| Contig30-snap.191                             | 11,6756422                   | 0,00333557               |
| Contig65-snap.25                              | inf                          | 0,00409407               |
| Contig80-snap.15                              | 3,577619607                  | 0,0046836                |
| Contig81-snap.24                              | 14,3205004                   | 0,00530466               |
| Contig11-snap.371                             | 2,536642133                  | 0,00549032               |
| Contig60-snap.86                              | 87,23891972                  | 0,00709599               |
| Contig43-snap.76                              | 5,296245508                  | 0,00714069               |
| Contig41-snap.5                               | 4,873269472                  | 0,00780334               |
| Contig70-snap.59                              | 3,294820797                  | 0,00829626               |
| Contig5-snap.322                              | 79,30225582                  | 0,00843321               |
| Contig14-snap.271                             | 3,385760678                  | 0,00917801               |
| Contig50-snap.180                             | 2,637900229                  | 0,00969665               |
| Contig18-snap.207                             | 78,60504474                  | 0,0103225                |
| Contig21-snap.203                             | 5,691977662                  | 0,0107445                |
| Contig114-snap.47                             | 3,607451503                  | 0,01173                  |
| Contig70-snap.44                              | 21,23570353                  | 0,011961                 |
| Contig5-snap.109                              | 73,6753447                   | 0,0122673                |
| Contig15-snap.100                             | 26,78809343                  | 0,012506                 |
| Contig2-snap.143                              | 39,36795862                  | 0,0133108                |
| Contig43-snap.100                             | 2,800452581                  | 0,0143238                |
| Contig122-snap.33                             | 12,62892558                  | 0,0143824                |
| Contig11-snap.54                              | 8,836162803                  | 0,0170202                |
| Contig45-snap.65                              | 10,71500041                  | 0,0205952                |
| Contig0-snap.107                              | 4,994949181                  | 0,0206185                |
| Contig45-snap.142                             | inf                          | 0,0206552                |
| Contig1-snap.244                              | 4,337248188                  | 0,0221536                |
| Contig45-snap.89                              | 12,50765998                  | 0,0224134                |
| Contig125-snap.20                             | 3,921566323                  | 0,0224164                |
| Contig13-snap.199                             | 2,791498924                  | 0,0228273                |
| Contig165-snap.14                             | inf                          | 0,0268869                |
| Contig91-snap.44                              | 3,577669204                  | 0,0272269                |
| Contig13-snap.239                             | 7,533132996                  | 0,0280861                |
| Contig36-snap.166                             | 2,722458392                  | 0,0282879                |
| Contig93-snap.38                              | inf                          | 0,0301426                |

|                   |             |             |
|-------------------|-------------|-------------|
| Contig65-snap.26  | 8,275520184 | 0,0314173   |
| Contig23-snap.131 | 9,258317253 | 0,0328285   |
| Contig7-snap.59   | 3,557761992 | 0,0328329   |
| Contig49-snap.90  | 3,471285437 | 0,0335256   |
| Contig0-snap.498  | 2,38574525  | 0,03497     |
| Contig5-snap.298  | 2,253129132 | 0,0364589   |
| Contig29-snap.28  | 4,126704113 | 0,0379509   |
| Contig12-snap.10  | inf         | 0,0391579   |
| Contig99-snap.10  | 2,124995815 | 0,039204    |
| Contig155-snap.3  | 47,83915494 | 0,0394386   |
| Contig12-snap.416 | 3,1659753   | 0,0409838   |
| Contig3-snap.167  | 2,16899992  | 0,0409838   |
| Contig125-snap.78 | 2,846699088 | 0,0411583   |
| Contig11-snap.380 | 2,20643921  | 0,0434612   |
| Contig43-snap.120 | 2,218062472 | 0,0438765   |
| Contig78-snap.48  | inf         | 0,0451409   |
| Contig23-snap.197 | 54,92039132 | 0,0451409   |
| Contig111-snap.8  | 45,22943284 | 0,0451409   |
| Contig106-snap.1  | 18,20698332 | 0,0487759   |
| Contig0-snap.648  | 3,022369399 | 0,0490452   |
| Contig116-snap.30 | 3,456471428 | 0,0491213   |
| Contig1-snap.120  | inf         | 0,0493838   |
| Contig28-snap.265 | 0,129880793 | 0           |
| Contig97-snap.101 | 0,076369479 | 1,7466E-12  |
| Contig56-snap.93  | 0,038545333 | 7,33573E-11 |
| Contig14-snap.170 | 0,090279986 | 1,83393E-10 |
| Contig10-snap.464 | 0,165198215 | 2,7573E-09  |
| Contig56-snap.97  | 0,040389945 | 2,7573E-09  |
| Contig36-snap.191 | 0,221967444 | 2,2105E-08  |
| Contig63-snap.66  | 0,226367696 | 2,68968E-08 |
| Contig97-snap.102 | 0,149884178 | 6,34591E-08 |
| Contig14-snap.131 | 0,178311295 | 9,9724E-08  |
| Contig77-snap.99  | 0,079934383 | 1,1698E-07  |
| Contig117-snap.28 | 0,208152097 | 1,17864E-07 |
| Contig113-snap.53 | 0,247973868 | 1,36443E-07 |
| Contig97-snap.4   | 0,147278628 | 1,45928E-07 |
| Contig10-snap.379 | 0,054318219 | 1,45928E-07 |
| Contig596-snap.1  | 0           | 4,02173E-07 |
| Contig87-snap.105 | 0,174699817 | 4,65774E-07 |
| Contig11-snap.483 | 0,028543182 | 9,35917E-07 |
| Contig129-snap.4  | 0,254733393 | 1,25038E-06 |
| Contig147-snap.12 | 0,066336651 | 1,63658E-06 |
| Contig1-snap.88   | 0,063084964 | 2,10043E-06 |
| Contig102-snap.20 | 0,143834334 | 2,52546E-06 |
| Contig351-snap.3  | 0,083092956 | 2,72689E-06 |
| Contig8-snap.30   | 0,006196976 | 4,8697E-06  |
| Contig143-snap.4  | 0,237189163 | 9,43974E-06 |
| Contig61-snap.159 | 0,029406523 | 1,26452E-05 |
| Contig14-snap.382 | 0,224699684 | 1,69382E-05 |
| Contig57-snap.107 | 0,031562165 | 1,87804E-05 |
| Contig6-snap.122  | 0,12688206  | 3,25359E-05 |
| Contig66-snap.69  | 0,097884891 | 5,78653E-05 |
| Contig32-snap.276 | 0,147143937 | 8,44083E-05 |
| Contig56-snap.180 | 0,179479379 | 8,54968E-05 |
| Contig113-snap.52 | 0,333262293 | 0,000095418 |



|                   |             |             |
|-------------------|-------------|-------------|
| Contig109-snap.22 | 0,206883429 | 9,54641E-05 |
| Contig320-snap.3  | 0,132744133 | 9,54641E-05 |
| Contig125-snap.27 | 0,240678638 | 9,63592E-05 |
| Contig17-snap.49  | 0,232415791 | 0,00010668  |
| Contig103-snap.29 | 0,103387953 | 0,00010668  |
| Contig4-snap.211  | 0,091354525 | 0,00010668  |
| Contig30-snap.226 | 0,055461483 | 0,00010668  |
| Contig69-snap.22  | 0,005980327 | 0,00010668  |
| Contig5-snap.274  | 0,228739908 | 0,000110519 |
| Contig10-snap.436 | 0,051785787 | 0,000132014 |
| Contig36-snap.257 | 0,006023259 | 0,000176584 |
| Contig100-snap.48 | 0,354495692 | 0,000207246 |
| Contig538-snap.2  | 0,103939073 | 0,000303722 |
| Contig90-snap.13  | 0,288595358 | 0,000325322 |
| Contig11-snap.43  | 0,254805796 | 0,000365236 |
| Contig17-snap.264 | 0,156744856 | 0,000505174 |
| Contig75-snap.112 | 0,013192301 | 0,000517447 |
| Contig0-snap.381  | 0,064646228 | 0,000553292 |
| Contig9-snap.313  | 0,201031015 | 0,000585007 |
| Contig141-snap.25 | 0,135514581 | 0,000604639 |
| Contig33-snap.23  | 0,382247773 | 0,000625135 |
| Contig105-snap.26 | 0,045746019 | 0,000705992 |
| Contig110-snap.55 | 0,025046451 | 0,000725377 |
| Contig1-snap.299  | 0,148843693 | 0,000733087 |
| Contig41-snap.114 | 0,182167816 | 0,000758377 |
| Contig2-snap.318  | 0,060444295 | 0,000792405 |
| Contig127-snap.54 | 0,079514953 | 0,000864763 |
| Contig2-snap.275  | 0,09453681  | 0,000987442 |
| Contig43-snap.58  | 0,292072817 | 0,00104124  |
| Contig124-snap.25 | 0,084121594 | 0,0010463   |
| Contig30-snap.268 | 0,346519873 | 0,00112257  |
| Contig127-snap.25 | 0,290278575 | 0,00113623  |
| Contig14-snap.198 | 0           | 0,00119696  |
| Contig14-snap.67  | 0,136411767 | 0,00125167  |
| Contig176-snap.15 | 0,337937885 | 0,00156484  |
| Contig77-snap.126 | 0,235315784 | 0,00159015  |
| Contig20-snap.87  | 0,165081459 | 0,00162149  |
| Contig62-snap.7   | 0,149554166 | 0,00197536  |
| Contig32-snap.157 | 0,077255422 | 0,00201161  |
| Contig30-snap.201 | 0,221253165 | 0,00221731  |
| Contig105-snap.6  | 0,276779692 | 0,00236551  |
| Contig61-snap.89  | 0,337659253 | 0,00247332  |
| Contig180-snap.9  | 0,020522354 | 0,00251249  |
| Contig746-snap.1  | 0,230706411 | 0,0026016   |
| Contig55-snap.82  | 0,198706366 | 0,00266865  |
| Contig31-snap.216 | 0,4009516   | 0,00270048  |
| Contig13-snap.374 | 0,342130826 | 0,0027383   |
| Contig138-snap.6  | 0,012526177 | 0,00284796  |
| Contig115-snap.3  | 0,390363481 | 0,00333557  |
| Contig25-snap.92  | 0,233240464 | 0,00333557  |
| Contig316-snap.1  | 0,061844967 | 0,00333557  |
| Contig638-snap.1  | 0,223393637 | 0,00345627  |
| Contig100-snap.5  | 0,351983572 | 0,00355141  |
| Contig226-snap.2  | 0,133744364 | 0,00360474  |
| Contig23-snap.196 | 0,19687475  | 0,00377964  |

|                   |             |            |
|-------------------|-------------|------------|
| Contig11-snap.474 | 0,274038405 | 0,00394852 |
| Contig68-snap.24  | 0,218887276 | 0,00394852 |
| Contig11-snap.260 | 0,404208061 | 0,00409407 |
| Contig50-snap.44  | 0,395749656 | 0,00440543 |
| Contig11-snap.210 | 0,116315882 | 0,0046836  |
| Contig18-snap.93  | 0,23959837  | 0,00475155 |
| Contig31-snap.69  | 0,406788275 | 0,00505112 |
| Contig11-snap.183 | 0,185316083 | 0,00516887 |
| Contig30-snap.188 | 0,086845807 | 0,00516887 |
| Contig102-snap.8  | 0,117734578 | 0,00532036 |
| Contig14-snap.349 | 0,036243598 | 0,00547608 |
| Contig2-snap.317  | 0,067416241 | 0,00638273 |
| Contig12-snap.221 | 0,254394608 | 0,00642965 |
| Contig43-snap.22  | 0,276962009 | 0,00698537 |
| Contig89-snap.78  | 0,156075934 | 0,00698537 |
| Contig11-snap.402 | 0,201710767 | 0,00709599 |
| Contig11-snap.150 | 0,313196501 | 0,00714069 |
| Contig9-snap.131  | 0,015545922 | 0,00724048 |
| Contig0-snap.344  | 0,443513523 | 0,00790813 |
| Contig61-snap.10  | 0,159160032 | 0,00790813 |
| Contig2-snap.327  | 0,403664886 | 0,00791615 |
| Contig10-snap.289 | 0,091353259 | 0,00809759 |
| Contig8-snap.280  | 0,437052956 | 0,00843321 |
| Contig30-snap.63  | 0,290153855 | 0,00874019 |
| Contig11-snap.7   | 0,168225697 | 0,00892375 |
| Contig14-snap.267 | 0,177325264 | 0,00917801 |
| Contig14-snap.68  | 0,255069093 | 0,00926488 |
| Contig97-snap.37  | 0,214714273 | 0,00937072 |
| Contig75-snap.2   | 0,309684268 | 0,00969665 |
| Contig35-snap.117 | 0,259160904 | 0,00993981 |
| Contig99-snap.45  | 0,199891634 | 0,00996932 |
| Contig14-snap.384 | 0,016946252 | 0,0100429  |
| Contig75-snap.45  | 0,128483945 | 0,0103225  |
| Contig33-snap.111 | 0,090981057 | 0,0103225  |
| Contig35-snap.18  | 0,296694482 | 0,01052    |
| Contig10-snap.340 | 0,304746171 | 0,0105511  |
| Contig5-snap.72   | 0,017931252 | 0,0106252  |
| Contig56-snap.84  | 0,313781021 | 0,0107445  |
| Contig104-snap.11 | 0,041949284 | 0,0107445  |
| Contig1160-snap.1 | 0           | 0,012323   |
| Contig5-snap.325  | 0,248281728 | 0,0124433  |
| Contig43-snap.55  | 0,349024448 | 0,012506   |
| Contig50-snap.120 | 0,193104006 | 0,012506   |
| Contig10-snap.254 | 0,24399441  | 0,012591   |
| Contig25-snap.48  | 0,045720025 | 0,0128824  |
| Contig61-snap.126 | 0,219836066 | 0,0140299  |
| Contig272-snap.1  | 0,139846883 | 0,0143238  |
| Contig6-snap.268  | 0,396328879 | 0,0143824  |
| Contig22-snap.178 | 0,220331856 | 0,0143824  |
| Contig34-snap.10  | 0,046566943 | 0,0143824  |
| Contig103-snap.59 | 0,276860281 | 0,0145896  |
| Contig145-snap.29 | 0,397611117 | 0,0149171  |
| Contig119-snap.50 | 0,019156529 | 0,0149171  |
| Contig11-snap.241 | 0,212106391 | 0,0149967  |
| Contig103-snap.51 | 0,335020202 | 0,0156301  |

|                   |             |           |
|-------------------|-------------|-----------|
| Contig13-snap.56  | 0,174639281 | 0,0156301 |
| Contig87-snap.122 | 0,301683981 | 0,0160403 |
| Contig40-snap.66  | 0,043539541 | 0,0170466 |
| Contig20-snap.196 | 0,063252223 | 0,0172997 |
| Contig7-snap.348  | 0,039360436 | 0,0192332 |
| Contig139-snap.33 | 0,234516283 | 0,0199627 |
| Contig60-snap.12  | 0,047230087 | 0,0199857 |
| Contig61-snap.81  | 0,23069042  | 0,0202204 |
| Contig11-snap.296 | 0,053070355 | 0,0207815 |
| Contig68-snap.73  | 0,203165874 | 0,0214741 |
| Contig103-snap.99 | 0,29197161  | 0,0218902 |
| Contig46-snap.15  | 0,121971839 | 0,0218902 |
| Contig8-snap.184  | 0,090620421 | 0,0218902 |
| Contig529-snap.1  | 0,188650784 | 0,0221346 |
| Contig11-snap.151 | 0,086109129 | 0,0224133 |
| Contig138-snap.5  | 0,24235101  | 0,0226078 |
| Contig31-snap.142 | 0,185674809 | 0,0226078 |
| Contig57-snap.69  | 0,099234804 | 0,0226078 |
| Contig125-snap.44 | 0,33974636  | 0,0226978 |
| Contig255-snap.2  | 0,028524591 | 0,0228273 |
| Contig71-snap.30  | 0,112669583 | 0,0229579 |
| Contig81-snap.40  | 0,02201911  | 0,0229579 |
| Contig14-snap.47  | 0,375631512 | 0,0233194 |
| Contig23-snap.104 | 0,222588351 | 0,0246983 |
| Contig31-snap.62  | 0,128226824 | 0,0249605 |
| Contig98-snap.66  | 0,436568517 | 0,0268217 |
| Contig11-snap.319 | 0,30534455  | 0,0268217 |
| Contig14-snap.63  | 0,159719238 | 0,0268217 |
| Contig130-snap.24 | 0,060521015 | 0,0268217 |
| Contig4-snap.213  | 0,182392713 | 0,0275784 |
| Contig8-snap.141  | 0,117972295 | 0,0275784 |
| Contig56-snap.69  | 0,179478135 | 0,0284166 |
| Contig75-snap.4   | 0,177300683 | 0,0284317 |
| Contig296-snap.2  | 0,034001919 | 0,0284782 |
| Contig70-snap.8   | 0,158220671 | 0,0291303 |
| Contig79-snap.18  | 0,217012492 | 0,0297596 |
| Contig32-snap.76  | 0,032265138 | 0,0297596 |
| Contig14-snap.86  | 0,35259893  | 0,0301426 |
| Contig419-snap.1  | 0,234708175 | 0,0301426 |
| Contig45-snap.121 | 0,171517775 | 0,0306335 |
| Contig10-snap.456 | 0,239975662 | 0,0315463 |
| Contig19-snap.51  | 0,065352218 | 0,0315463 |
| Contig39-snap.128 | 0           | 0,0315463 |
| Contig25-snap.107 | 0,149760597 | 0,0315887 |
| Contig24-snap.271 | 0,461224163 | 0,0316623 |
| Contig85-snap.22  | 0,032946522 | 0,0318677 |
| Contig26-snap.36  | 0,180418602 | 0,0327456 |
| Contig39-snap.102 | 0,372419366 | 0,0328329 |
| Contig123-snap.1  | 0,101530142 | 0,0328329 |
| Contig17-snap.252 | 0,023531384 | 0,0328329 |
| Contig139-snap.55 | 0,165925784 | 0,0333581 |
| Contig14-snap.33  | 0,025719208 | 0,0333581 |
| Contig17-snap.112 | 0,245363065 | 0,0335256 |
| Contig145-snap.30 | 0,408220348 | 0,0335616 |
| Contig1-snap.82   | 0,226306511 | 0,0364589 |

|                   |             |           |
|-------------------|-------------|-----------|
| Contig14-snap.357 | 0,069649171 | 0,0364589 |
| Contig10-snap.373 | 0,048384877 | 0,0364589 |
| Contig28-snap.217 | 0,374417559 | 0,0365082 |
| Contig14-snap.311 | 0,3900227   | 0,0379509 |
| Contig97-snap.126 | 0,178337252 | 0,0379509 |
| Contig27-snap.188 | 0,105757362 | 0,0379509 |
| Contig31-snap.323 | 0,429086376 | 0,039204  |
| Contig26-snap.33  | 0,139935121 | 0,0394386 |
| Contig47-snap.162 | 0,041426565 | 0,0394386 |
| Contig26-snap.105 | 0,035200507 | 0,0396762 |
| Contig69-snap.9   | 0           | 0,0396762 |
| Contig59-snap.151 | 0,395831958 | 0,0399193 |
| Contig23-snap.122 | 0,057827919 | 0,0409057 |
| Contig68-snap.82  | 0,026065584 | 0,0414377 |
| Contig145-snap.27 | 0,473931349 | 0,0420894 |
| Contig30-snap.228 | 0,272855683 | 0,0420894 |
| Contig14-snap.100 | 0,196356873 | 0,0422089 |
| Contig49-snap.25  | 0,139910874 | 0,0422089 |
| Contig18-snap.193 | 0           | 0,0422089 |
| Contig144-snap.39 | 0,138325592 | 0,0427174 |
| Contig71-snap.22  | 0,045734605 | 0,0429852 |
| Contig32-snap.91  | 0,299299132 | 0,04327   |
| Contig15-snap.71  | 0,505167594 | 0,0436495 |
| Contig97-snap.107 | 0,346027835 | 0,0436495 |
| Contig5-snap.67   | 0,280077889 | 0,0436495 |
| Contig26-snap.72  | 0,27336681  | 0,0436495 |
| Contig18-snap.260 | 0,158129671 | 0,0436495 |
| Contig24-snap.174 | 0,075086117 | 0,0436495 |
| Contig73-snap.30  | 0,044867357 | 0,0436495 |
| Contig123-snap.25 | 0,196818809 | 0,0440327 |
| Contig14-snap.199 | 0,233918845 | 0,044093  |
| Contig140-snap.28 | 0,444649356 | 0,0451409 |
| Contig126-snap.11 | 0,028468889 | 0,0451409 |
| Contig10-snap.426 | 0,087819188 | 0,0471901 |
| Contig17-snap.161 | 0,065427457 | 0,0478031 |
| Contig14-snap.418 | 0,044978208 | 0,0478031 |
| Contig17-snap.45  | 0,428022932 | 0,0485581 |
| Contig31-snap.287 | 0,108101616 | 0,0485581 |
| Contig8-snap.357  | 0,485051555 | 0,0487759 |
| Contig627-snap.1  | 0,29613358  | 0,0490452 |
| Contig100-snap.50 | 0,400163088 | 0,0493838 |
| Contig0-snap.323  | 0,052822998 | 0,0493838 |

**Supplementary Table 2: List of gene specific primers of *Isy-12* 3' and 5' RACE**

| CDNA END | PRIMER     | OLIGO                          |
|----------|------------|--------------------------------|
| 3'       | Co6GSP2    | GCCGTGTTTGTGCGCCGCAGTACGCGAGA  |
|          | Co6NGSP2   | GAGGGCGCGAGCAGCAGCAATGAGGACG   |
|          | Co6.1GSP2  | GAAATCGCGGCGGACACGGGCATCTCTC   |
|          | Co6.1NSP2  | GGCGCTCGGGATGCTCGTCAAGAGCGAG   |
|          | Co6.2GSP2  | GCTAAATTTTGGCATGGCCCCTCACTCG   |
|          | Co6.2NGSP2 | GCGGCGGTATGCAGTCCACGCCGGGCAG   |
| 5'       | Co6GSP1    | GTACTIONGAGGCAGAACTCGCAGATGTAC |
|          | Co6NGSP1   | GATAGGGCGCGGTGAACCACGTCTCCAT   |
|          | Co6.1GSP1  | CCTCATATGCCGCCCACTGGTCCTGCGT   |
|          | Co6.1NSP1  | GCGTCGGCTCGTCACTGGGCGGCATCGA   |

**Supplementary Table 3: List of primers used for *as-eud-1* transcript identification**

| <b>Primer</b> | <b>Oligo</b>                 |
|---------------|------------------------------|
| Co10F3        | GGAAGACTTCCGCAAGAAGCATGC     |
| Co10R6        | CTCGAGTGTTTCATTCCTCAGGACATTG |
| Co10F4        | AGGGCCGAGTGGGCTACAAGGG       |
| Co10R5        | CCTACTACATCTCCACGCAGTGATC    |
| CoasFn        | GAAGAACAAAACACACGGAGAAG      |
| Co10asRn      | ACTACCGAAAGACGAGACTACAATG    |

**Supplementary Table 4: List of antibodies used in this study**

| <b>Antibody</b> | <b>Host</b> | <b>Type</b> | <b>Company</b> | <b>Dilution</b> | <b>Cat. #</b> |
|-----------------|-------------|-------------|----------------|-----------------|---------------|
| Alpha tubulin   | Mouse       | mAb         | SIGMA ALDRICH  | 1:100           | F22168        |
| H3K4me3         | Mouse       | mAb         | Diagenode      | 1:1000          | C15200152     |
| H3K4me2         | Rabbit      | pAb         | Diagenode      | 1:1000          | C15410035     |
| H3K4me1         | Mouse       | mAb         | Diagenode      | 1:1000          | Mab-150-050   |
| H3K9ac          | Mouse       | mAb         | Diagenode      | 1:1000          | Mab-185-050   |
| H3K27ac         | Mouse       | mAb         | Diagenode      | 1:1000          | C15200184     |
| H2Bub           | Mouse       | mAb         | Active Motif   | 1:1000          | 39623, 39624  |
| H2Aub           | Mouse       | mAb         | Millipore      | 1:2000          | 05-678        |
| H4K20me1        | Rabbit      | pAb         | Abcam          | 1:1000          | 9051          |
